# Supplementary material
Source: PubMed Central journal article supplement (PMC4201502)
Supplement: NIHMS632486-supplement-Supplement1.pdf [file NIHMS632486-supplement-Supplement1.pdf]

## Supplementary Appendix

This appendix has been provided by the authors to give readers additional information about their work.

Supplement to: Antonarakis ES, Lu C, Wang H, et al. AR-V7 and resistance to enzalutamide and abiraterone in prostate cancer. *N Engl J Med* 2014;371:1028-38. DOI: 10.1056/NEJMoa1315815

## Supplementary Appendix

### Table of Contents

1. METHODS (pages 2–6)
2. FIGURES [Figures S1-S10] (pages 7–20)
  - Figure S1.** Detection of AR-V7 transcript in CTCs (page 7)
  - Figure S2.** Justification for threshold of detection of AR-V7 (page 8)
  - Figure S3.** Overall survival analysis stratified by AR-V7 status in enzalutamide-treated patients and abiraterone-treated patients (page 9)
  - Figure S4.** Combined analysis of patient outcome by AR-V7 status (page 11)
  - Figure S5.** Changes in AR-V7 and AR-FL transcript copy numbers detected in CTCs before and after treatment with enzalutamide and abiraterone (page 14)
  - Figure S6.** Detection of AR-FL and AR-V7 using RNA-ISH in cell lines with known expression of AR-FL and AR-V7 (page 16)
  - Figure S7.** Detection of AR-V7 at the protein level using Western blot analysis in patients with detectable AR-V7 transcript in CTCs (page 17)
  - Figure S8.** Changes in expression levels of the PSA transcript before and after therapy with enzalutamide or abiraterone in men with baseline detectable AR-V7 (page 18)
  - Figure S9.** RNA-Seq analysis of the AR transcript in two AR-V7–positive patients and two AR-V7–negative patients (page 19)
  - Figure S10.** Gene set enrichment analysis of metastatic tumors from AR-V7–positive and AR-V7–negative patients (page 20)
3. TABLES [Tables S1-S6] (pages 21–28)
  - Table S1A.** Baseline characteristics of the 31 patients treated with enzalutamide (page 21)
  - Table S1B.** Baseline characteristics of the 31 patients treated with abiraterone (page 22)
  - Table S2.** Clinical outcomes (PSA responses, PSA-PFS and PFS) reported separately according to prior exposure to abiraterone (in the enzalutamide cohort) and prior exposure to enzalutamide (in the abiraterone cohort) (page 23)
  - Table S3.** Propensity score weighted multivariable Cox models adjusted for Gleason score, baseline PSA, number of prior hormonal treatments, presence of visceral metastases, ECOG score, prior abiraterone/enzalutamide use, and AR-FL levels (page 24)
  - Table S4.** Clinical outcomes (PSA responses, PSA-PFS and PFS) for the entire patient population according to their AR-V7 ‘conversion’ rates (page 25)
  - Table S5.** Expression profiles of AR-regulated genes in AR-V7–positive and AR-V7–negative metastatic tumors (page 26)
  - Table S6.** R2 values for regression models that include only AR-FL levels (continuous variable) compared to regression models that additionally include AR-V7 status, for each clinical outcome (PSA response rate, PSA-PFS and PFS) (page 28)
4. REFERENCES (page 29)

## Methods

### Analysis of circulating tumor cells

CTC analyses were conducted using the commercially-available Alere™ CTC AdnaTest platform (AdnaGen, Langenhagen, Germany). This assay does not enable CTC enumeration. Isolation and enrichment of CTCs was performed using the ProstateCancerSelect kit, and mRNA expression analyses were performed using the ProstateCancerDetect kit with multiplexed reverse-transcription polymerase-chain-reaction (qRT-PCR) primers to detect the presence of CTCs, and custom primers designed to detect the full-length-AR (AR-FL) and AR splice variant-7 (AR-V7).<sup>1,2</sup> The relative AR-V7 transcript abundance was determined by calculating the ratio of AR-V7 to AR-FL.<sup>1,2</sup> Additional details are provided below.

Blood samples were collected using standard BD Vacutainer® lavender top blood collection tubes (Becton Dickinson, Franklin Lakes, NJ) (Product #: 367862) by venipuncture, and carried to the lab on ice. Laboratory processing was carried out within 2 hours of collection, according to instructions provided by the Alere™ CTC AdnaTest (Alere Inc., San Diego, CA). The AdnaTest is a CE-marked, RNA-based CTC enrichment and detection test with two components/kits. Briefly, the ProstateCancerSelect (Product No. T-1-520) kit was used to enrich CTC from 5ml blood using magnetic particles coated with a combination of antibodies recognizing prostate cancer cells, while the ProstateCancerDetect (Product No. T-1-521) kit was used to make cDNA for detection of prostate cancer-associated RNA transcripts using multiplexed polymerase chain reaction (PCR). On the basis of detection of PCR signals for PSA, PSMA, or EGFR (very rarely detected) by the Agilent Bioanalyzer (Agilent Technologies, Palo Alto, CA), CTC calls were made for each sample tested. The test was adapted for detection and quantification of AR-FL and AR-V7 by quantitative real-time PCR using custom primers specific for AR-FL (forward: 5'-CAGCCTATTGCGAGAGAGCTG-3', reverse: 5'-GAAAGGATCTTGGGCACTTGC-3') and AR-V7 (forward: 5'-CCATCTTGTCGTCTTCGGAAATGTTA-3', reverse: 5'-TTTGAATGAGGCAAGTCAGCCTTTCT-3'). Briefly, PCR reactions were carried out under optimized conditions at 95°C x 10s, 58°C x 30s, and 72°C x 30s for 39 cycles followed by melting curve analysis.

Standard dilution curves from known quantities of AR-FL and AR-V7 was generated for calculating absolute transcript copy numbers for AR-FL and AR-V7. Laboratory data was generated for each patient enrolled in the study in a blinded fashion and recorded into the master data sheet on a weekly basis. To rule out false positive and false negative findings, a number of quality control measures were implemented each time the assay was performed, including negative and positive controls at multiple levels for both CTC detection and AR quantification. This laboratory-developed RNA-based assay modified from a commercially available circulating tumor cell (CTC) detection platform was thoroughly evaluated and internally validated with standard quality measures implemented. First, all samples collected from healthy volunteers (n=4) and CTC-negative CRPC patients (n=9) were negative for AR-FL and AR-V7, excluding the possibility of false-positive detection due to contaminating leukocytes. Second, the test consistently detected both AR-FL and AR-V7 in normal blood samples spiked with 5 AR-V7 positive cells (n=6). Third, overnight shipping of blood samples and storage of partially processed cell lysates (up to two weeks) did not compromise assay results (although our current study does not involving shipping). Fourth, all tests on clinical specimens were performed using a fraction (10%) of the cDNA yield from 5 mL of blood, and were always accompanied by two negative and two positive controls. Detailed technical protocols will be made available upon request.

#### RNA *in situ* hybridization

RNA in situ hybridization (RISH) was performed to detect the androgen receptor (AR) and AR-V7 using the ACD (Advanced cell Diagnostics, Hayward, CA) RNAscope 2.0 Brown kit. Briefly, formalin-fixed paraffin-embedded (FFPE) tissue or cell pellet blocks were sectioned and the slides baked for one hour at 60°C. The slide were subsequently de-paraffinized with xylene for 20 min at room temperature, and allowed to air dry following two rinses using 100% ethanol. Following a series of pretreatment steps, the cells were permeablized using protease to allow probe access to the RNA target. ACD target probes, a series of paired oligonucleotides forming a binding site for a preamplifier, were custom designed to detect RNA corresponding to exon 1 of the human AR (ACD 401211), or the cryptic AR exon 3 sequence<sup>1,3</sup> that encode human AR-V7 (ACD 401221). Hybridization of the probes to the AR

RNA targets was performed by incubation in the oven for 2 hours at 40 °C. Following two washes, the slides were processed for standard signal amplification steps per manufacturer's instructions.

#### Western Blot

Whole cell protein extracts were prepared from cultured prostate cancer cells or cryosections prepared from clinical specimens by using RIPA buffer (radioimmunoprecipitation assay buffer) (Cell Signaling Technology, Danvers, MA) supplemented with 1X protease inhibitors (Roche, Indianapolis, IN) and 1X phosphatase inhibitors (Thermo Fisher Scientific, Rockford, IL). Standard blots were prepared following electrophoresis of forty µg protein per sample on a 10% SDS-PAGE precast gel (Bio-Rad Laboratories, Hercules, CA), and incubated overnight with anti-AR-V7<sup>4</sup> (1 µg/mL), anti-AR (N20) (1:2000 dilution) (sc-816, Santa Cruz Biotechnology, Dallas, TX), anti-PSA (C-19) (1:500) (sc-7638, Santa Cruz Biotechnology), and anti-β-actin (1:5000 dilution) (Sigma, St Louis, MO). Following incubation with horseradish-peroxidase(HRP)-conjugated secondary antibodies, immunoreactive bands were visualized using the SuperSignal West Pico Chemiluminescent Substrate system (I-34080) (Thermo Fisher Scientific, Rockford, IL) on HyBlot CL film (E3022) (Denville Scientific, South Plainfield, NJ).

#### Prostate cancer cell lines

LNCaP cells (ATCC, Manassas, VA) were maintained in RPMI1640 medium (Invitrogen, Carlsbad, CA) with 10% fetal bovine serum (FBS, Sigma–Aldrich, St. Louis, MO). LNCaP95 is an AR-V7-positive androgen-independent cell line derived from the parental LNCaP cells as described previously<sup>4</sup>. LNCaP95 cells were maintained in phenol red-free RPMI 1640 medium supplemented with 10% charcoal stripped FBS (CSS). For analysis of androgen-induced changes in AR-V7, LNCaP95 cells were treated with R1881 (NEN, Waltham, MA) or ethanol vehicle control as described previously<sup>4</sup>. These cell lines were authenticated (DDC Medical, Fairfield, OH) using short tandem repeats DNA profiling and tested negative for mycoplasma.

## Metastatic prostate tumor tissue specimens

To investigate concordance in AR-V7 status between CTCs and tumor tissue, qRT-PCR analysis for AR-V7 was performed on fresh metastatic tumor biopsies (or autopsy specimens) from a subset of patients who consented to this. In addition, RNA in situ hybridization (RNA-ISH) was performed according to the manufacturer's instructions using the RNAscope platform (Advanced Cell Diagnostics, Hayward, CA) to visualize AR-V7 mRNA in formalin-fixed paraffin-embedded metastatic tumor tissues, and to correlate this with AR-V7 detection in CTCs. Additional details are provided below.

Research autopsies were performed on two patients who died during the course of treatment with enzalutamide. Both patients were AR-V7 positive as determined by the CTC assay before and after treatment. Metastatic prostate tumors were dissected and flash frozen blocks prepared. Following histological analysis, cryosections enriched for tumor cells were prepared following manual trimming of the frozen blocks, using a standard procedure as described previously<sup>5</sup>. High-quality total RNA in adequate quantity was extracted from two specimens (one from each patient) and labeled as AR-V7(+) Met1 and AR-V7(+) Met2, respectively. To identify relevant AR-V7-negative metastatic CRPC samples for comparison, we analyzed AR-FL and AR-V7 expression levels in a separate collection of CRPC specimens from men consented for autopsy (before the development of enzalutamide and abiraterone) as described previously<sup>1,6,7</sup>. Two specimens that were AR-V7 negative but with AR-FL levels similar to those detected in other mCRPC specimens were identified from this collection of specimens. These two samples were labeled AR-V7(-) Met1 and AR-V7(-) Met2. Both samples were processed histologically in a similar fashion to enrich prostate carcinoma cells.

## RNA-Seq analysis

Four metastatic prostate tissue specimens, AR-V7(+) Met1, AR-V7(+) Met2, AR-V7(-) Met1, and AR-V7(-) Met 2, were subjected to RNA-Seq following the standard TruSeq Stranded Total RNA Sample Prep Kit and sequenced using the Illumina HiSeq 2000 platform (Illumina Inc, San Diego, CA). We generated an average of ~63 million reads per sample. Sequences were aligned to UCSC hg19 genome build using TopHat, and mutation and splice junctions visualized using Integrated Genome

Viewer (IGV) <sup>8</sup>. Read counts (gene expression levels) were obtained using HTSeq <sup>9</sup>, and normalized per kilo base-pair gene length and per million reads library size (RPKM). Fold expression changes (FC) between the two conditions (AR-V7(+)) and AR-V7(-)) were calculated. Genes were pre-ranked by logFC and subjected to Gene Set Enrichment Analysis (GSEA) <sup>10</sup>. Both raw and processed RNA-Seq data were deposited in the Gene Expression Omnibus (accession number: GSE56701).

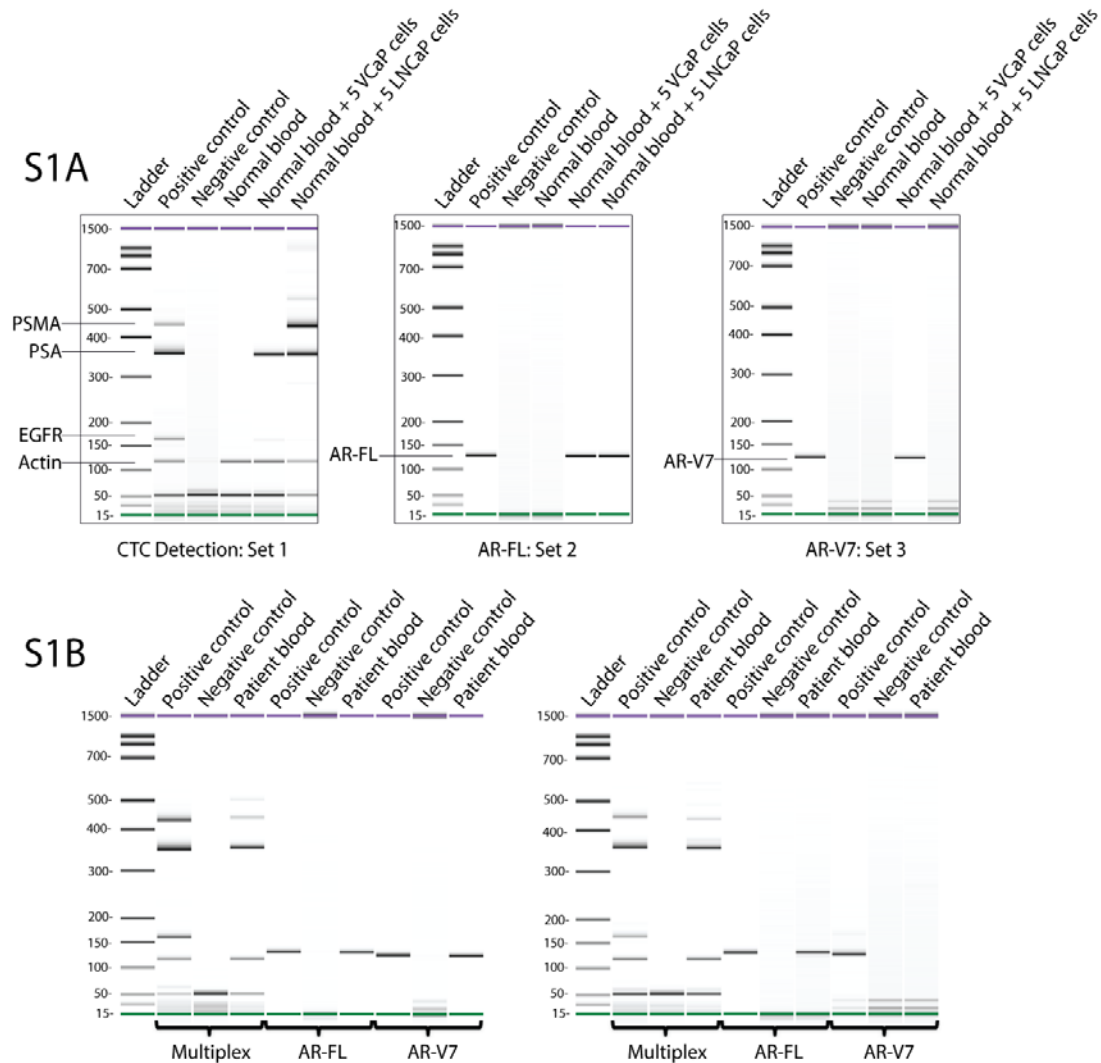

**Figure S1. Detection of AR-V7 transcript in CTCs.**

(A) Blood-based detection of full-length androgen receptor (AR-FL) and AR splice variant-7 (AR-V7) transcripts in tumor cells spiked into 5 mL of blood from normal human volunteers. Following CTC capture, lysis, and cDNA synthesis, three sets of independent PCR reactions were performed to examine the presence of CTC-specific mRNA transcripts by multiplex PCR (set 1), as well as transcripts for AR-FL (set 2) and AR-V7 (set 3). (B) Examples of positive and negative detection of AR-V7 in baseline (pre-treatment) blood samples from two enzalutamide-treated patients. The patient in the **left panel** is positive for both AR-FL and AR-V7, while the patient in the **right panel** is positive only for AR-FL but negative for AR-V7. Both patients were positive for CTCs, as determined by the multiplex PCR assay (based on the examination of PSMA, PSA, EGFR and Actin) per the manufacturer's instructions provided by AdnaGen.



**S2 A**

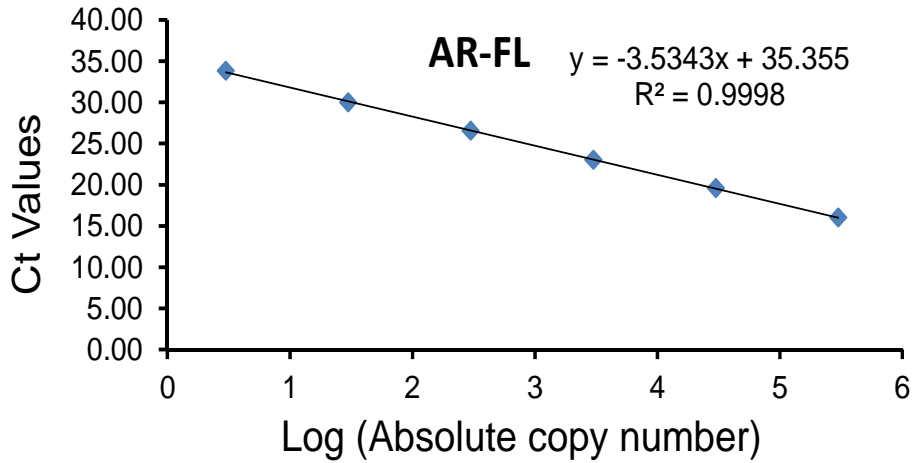

**S2 B**

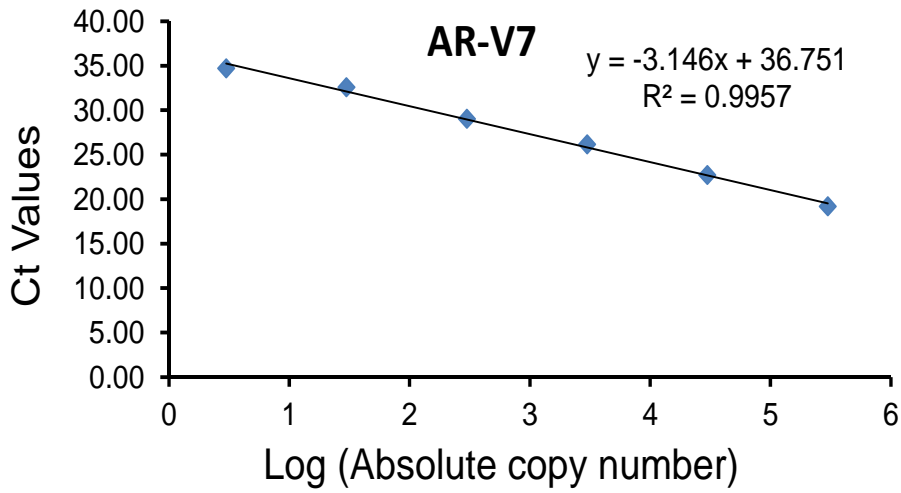

**Figure S2. Justification for threshold of detection of AR-V7.**

Standard dilution curves for AR-FL and AR-V7 are shown. Threshold cycle numbers (Y axis) in quantitative PCR reactions were determined for complementary DNA (cDNA) specific to AR-FL (**A**) and AR-V7 (**B**) at 6 dilutions containing the indicated number of copies of each transcript (X axis). Formulas were derived to quantify the absolute copy numbers on the basis of Ct values.

**S3 A**

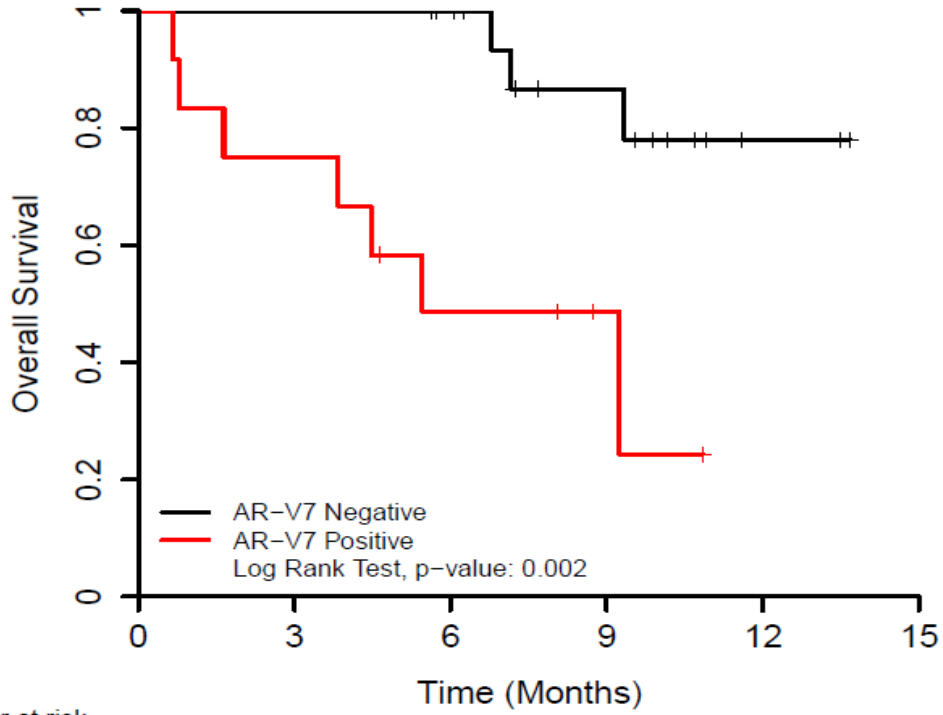

Number at risk

|                 |    |    |    |    |   |   |
|-----------------|----|----|----|----|---|---|
| AR-V7 Negative: | 19 | 19 | 17 | 10 | 2 | 0 |
| AR-V7 Positive: | 12 | 9  | 5  | 2  | 0 | 0 |

**S3 B**

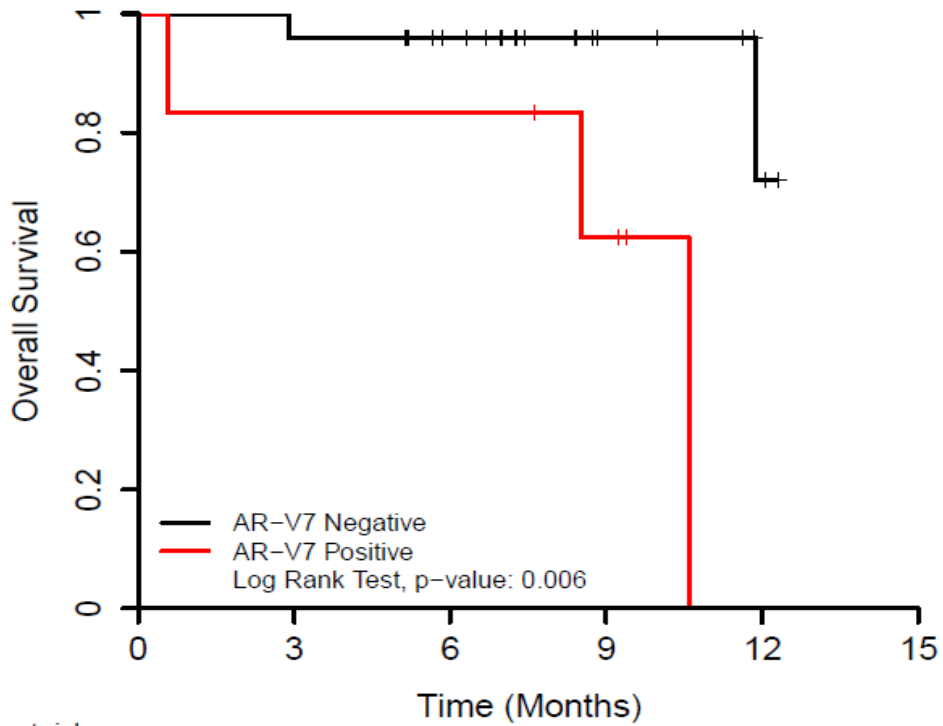

Number at risk

|                 |    |    |    |   |   |   |
|-----------------|----|----|----|---|---|---|
| AR-V7 Negative: | 25 | 24 | 19 | 7 | 3 | 0 |
| AR-V7 Positive: | 6  | 5  | 5  | 3 | 0 | 0 |

**Figure S3. Overall survival (OS) analysis stratified by AR-V7 status in enzalutamide-treated patients and abiraterone-treated patients.**

**(A)** Median OS in enzalutamide-treated patients was 5.5 months (95%CI, 3.9–not reached) and not reached (95%CI, not reached–not reached) in AR-V7–positive and AR-V7–negative patients, respectively (HR 6.9, 95%CI 1.7–28.1, log-rank  $P=0.002$ ).

**(B)** Median OS in abiraterone-treated patients was 10.6 months (95%CI, 8.5–not reached) and >11.9 months (95%CI, 11.9–not reached) in AR-V7–positive and AR-V7–negative patients, respectively (HR 12.7, 95%CI 1.3–125.3, log-rank  $P=0.006$ ).

**S4 A**

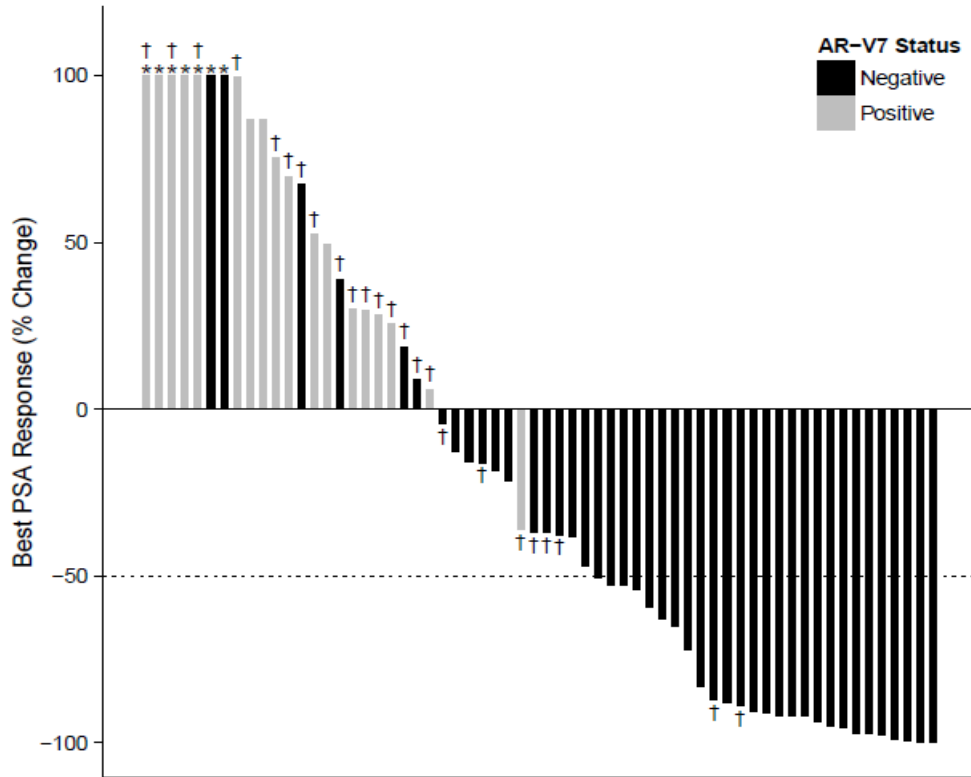

**S4 B**

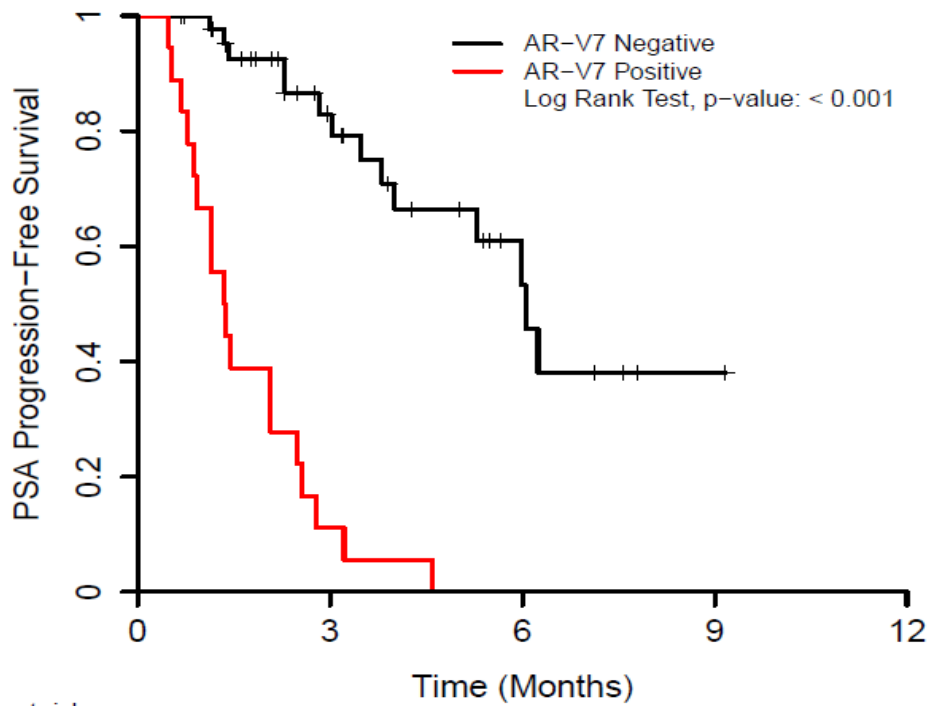

| Number at risk  |    | 0  | 3 | 6 | 9 | 12 |
|-----------------|----|----|---|---|---|----|
| AR-V7 Negative: | 44 | 22 | 7 | 1 | 0 | 0  |
| AR-V7 Positive: | 18 | 2  | 0 | 0 | 0 | 0  |

**S4 C**

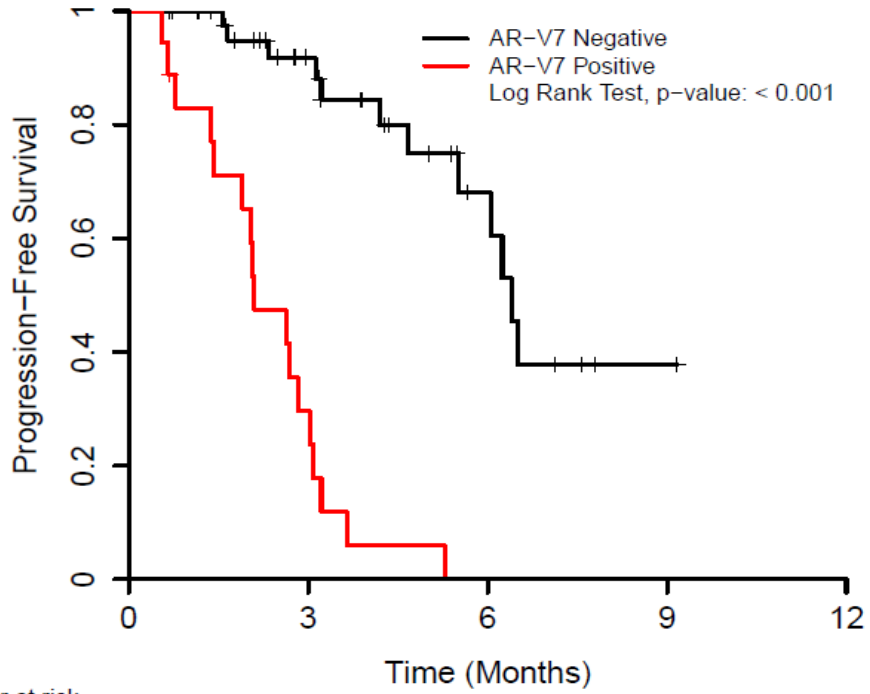

Number at risk

|                 |    |    |   |   |   |
|-----------------|----|----|---|---|---|
| AR-V7 Negative: | 44 | 25 | 9 | 1 | 0 |
| AR-V7 Positive: | 18 | 5  | 0 | 0 | 0 |

**S4 D**

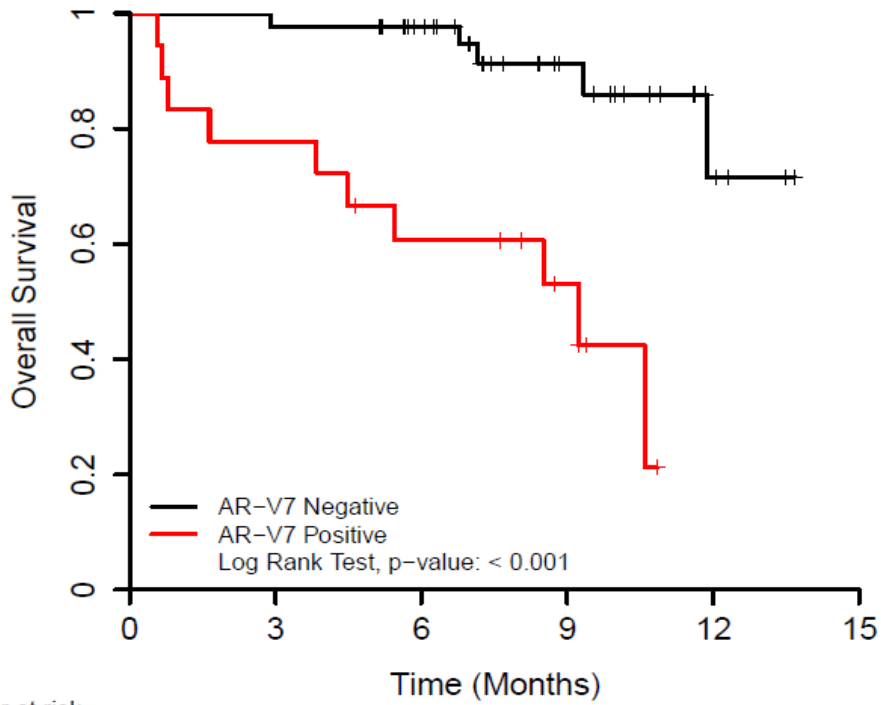

Number at risk

|                 |    |    |    |    |   |   |
|-----------------|----|----|----|----|---|---|
| AR-V7 Negative: | 44 | 43 | 36 | 17 | 5 | 0 |
| AR-V7 Positive: | 18 | 14 | 10 | 5  | 0 | 0 |

**Figure S4. Combined analysis of patient outcome by AR-V7 status.**

**(A) Waterfall plot showing best PSA responses according to CTC AR-V7 status for all 62 patients.**

The ‘asterisk’ marks (\*) indicate clipped bars. The dotted line shows the threshold for defining a PSA response. Men who had previously received abiraterone and enzalutamide (in the enzalutamide and abiraterone cohorts, respectively) are denoted with ‘dagger’ marks (†). The overall proportion of patients who achieved a PSA response to either therapy was 44% (27/62 men; 95%CI, 31–57%). PSA response rates were 0% (0/18 men; 95%CI, 0–19%) in AR-V7–positive patients and 61% (27/44 men; 95%CI, 45–76%) in AR-V7–negative patients ( $P<0.001$ ). Considered alternatively, among patients achieving a PSA response, 0% (0/27 men; 95%CI, 0–13%) were AR-V7–positive; while in patients not achieving a PSA response, 51% (18/35 men; 95%CI, 34–69%) were AR-V7–positive. In linear regression modeling, AR-V7 status remained predictive for PSA response after adjusting for AR-FL expression levels ( $P<0.001$ ).

**(B) Kaplan-Meier curves showing PSA-progression-free-survival [PSA-PFS] stratified by CTC AR-V7 status in all 62 patients.**

Median PSA-PFS was 1.4 months (95%CI, 0.9–2.6) and 6.1 months (95%CI, 5.3–not reached) in AR-V7–positive and AR-V7–negative patients, respectively (HR 10.5, 95%CI 4.7–23.6, log-rank  $P<0.001$ ). In multivariable Cox regression analysis stratified by treatment type, AR-V7 detection remained independently predictive of PSA-PFS (HR 8.2, 95%CI 2.7–24.9,  $P<0.001$ ). Presence of visceral metastases and more prior hormonal therapies were also predictive of PSA-PFS; while AR-FL level, prior use of enzalutamide/abiraterone, and baseline PSA level were not predictive.

**(C) Kaplan-Meier curves showing clinical/radiographic-progression-free-survival [PFS] stratified by CTC AR-V7 status in all 62 patients.**

Median PFS was 2.1 months (95%CI, 1.9–3.1) and 6.4 months (95%CI, 6.1–not reached) in AR-V7–positive and AR-V7–negative patients, respectively (HR 12.7, 95%CI 5.1–31.9, log-rank  $P<0.001$ ). In multivariable Cox regression analysis stratified by treatment type, AR-V7 detection remained independently predictive of PFS (HR 4.9, 95%CI 1.7–13.8,  $P=0.003$ ). AR-FL levels, more prior hormonal therapies and prior use of enzalutamide/abiraterone were also predictive of PFS; while baseline PSA level, and presence of visceral metastases were not predictive.

**(D) Kaplan-Meier curves showing overall survival [OS] stratified by CTC AR-V7 status in all 62 patients.**

Median OS was 9.2 months (95%CI, 4.5–not reached) and >11.9 months (95%CI, 11.9–not reached) in AR-V7–positive and AR-V7–negative patients, respectively (HR 8.3, 95%CI 2.5–27.4, log-rank  $P<0.001$ ). In multivariable Cox regression analysis stratified by treatment type, AR-V7 detection remained independently predictive of OS (HR 5.0, 95%CI 1.3–19.8,  $P=0.021$ ). Prior use of enzalutamide/abiraterone was also predictive of OS, while AR-FL level was not predictive.

S5 A

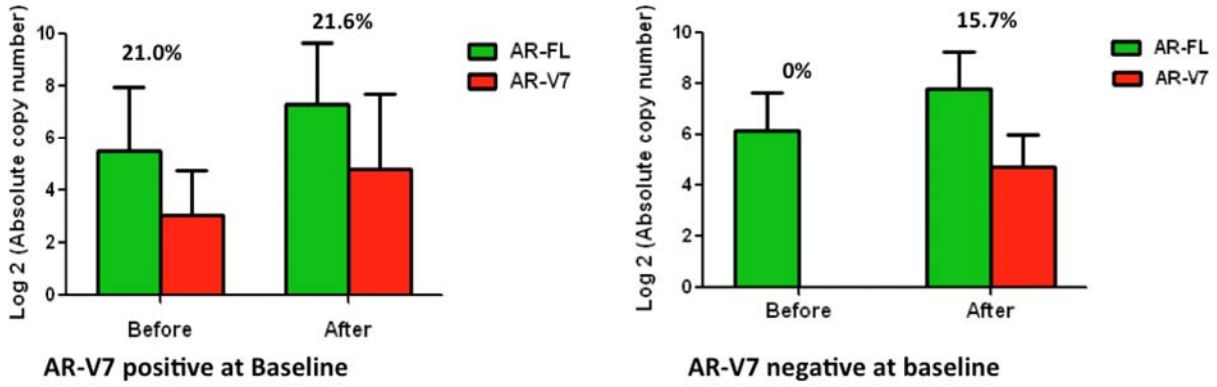

S5 B

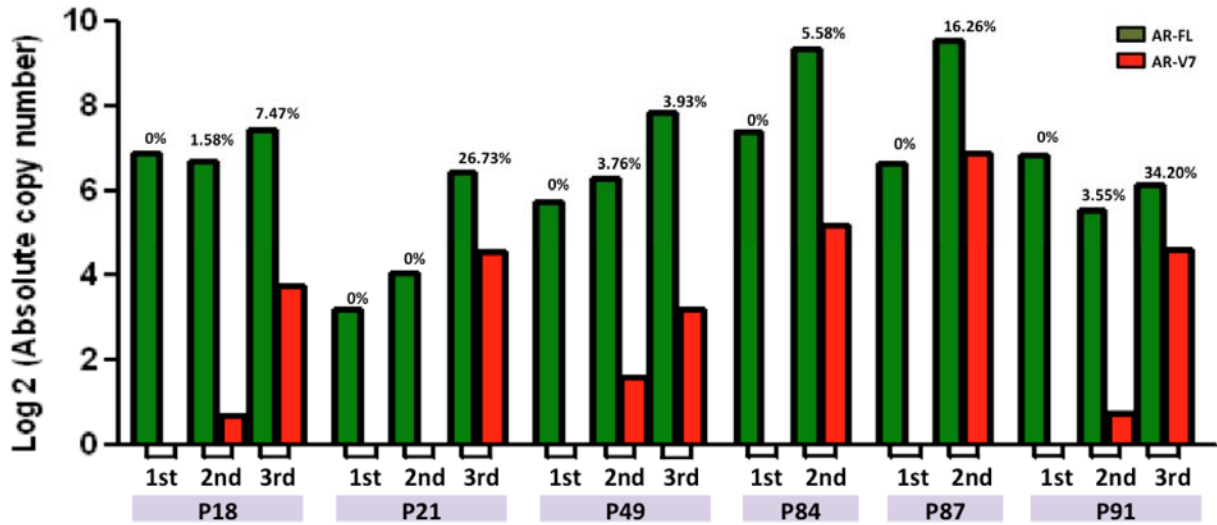

**Figure S5. Changes in AR-V7 and AR-FL transcript copy numbers detected in CTCs before and after treatment with enzalutamide and abiraterone.**

**(A)** Alterations in AR-FL and AR-V7 transcript copy numbers before and after enzalutamide/abiraterone treatment in patients with baseline detectable AR-V7 (n=16, with paired samples available) (*left panel*) and in patients who converted from initially undetectable to later detectable AR-V7 (n=6) (*right panel*). Higher copy numbers for both AR-FL and AR-V7 were detected in CTC samples collected after treatment (at the time of resistance to therapy) compared to baseline (pretreatment) samples. Note that the AR-V7/AR-FL ratio is similar between samples collected before and after treatment in patients with baseline detectable AR-V7 (~21%), and that an average AR-V7/AR-FL ratio of 15.7% was detected in patients who converted from initially undetectable to later detectable AR-V7. In patients who converted from initially undetectable to later detectable AR-V7, copy number values for AR-V7 were generated from the last follow-up CTC samples (see B, below).

**(B)** AR transcript copy numbers detected in the 6 patients whose AR-V7 status was negative at baseline but converted to positive during treatment. Absolute transcript copy numbers for AR-FL and AR-V7 are shown for each of the 6 patients before, during, and after treatment with enzalutamide or abiraterone (1st: before treatment; 2nd: during treatment; 3rd: at the time of progression). The percentage values represent the ratio of the absolute copy number of AR-V7 to AR-FL in CTCs. As shown, absolute AR-V7 levels (and AR-V7/AR-FL ratios) increased with time in all 6 cases. Patients P18, P21, P49 and P87 were treated with enzalutamide. Patients P84 and P91 were treated with abiraterone.



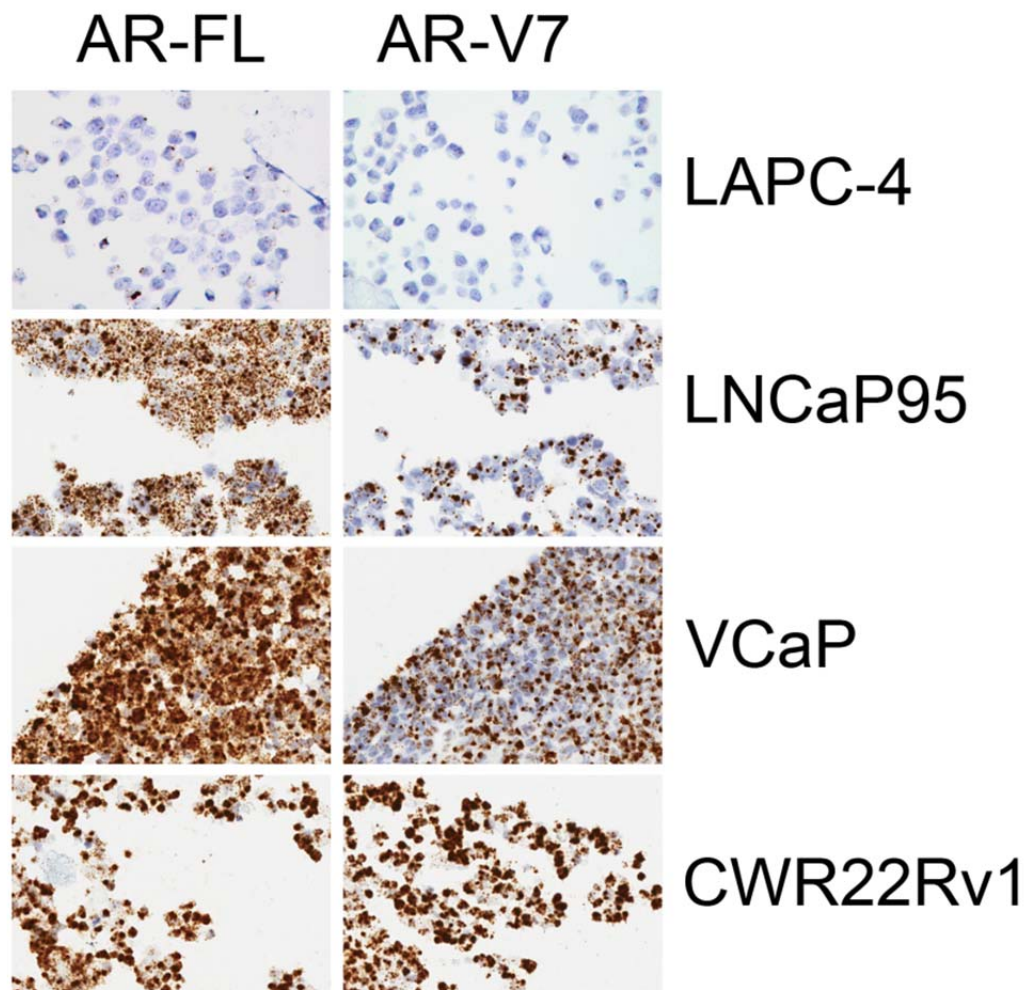

**Figure S6. Detection of AR-FL and AR-V7 using RNA-ISH in cell lines with known expression of AR-FL and AR-V7.**

Three of the prostate cancer cell lines shown (LNCaP95, VCaP and CWR22Rv1) express AR-FL as well as AR-V7, while the LAPC-4 line is positive only for AR-FL but negative for AR-V7, as visualized using RNA-ISH analysis. These prostate cancer cell lines served as positive and negative controls for AR-V7 detection by RNA-ISH in the patient-derived metastatic prostate cancer tissue samples shown in Fig. 4 of the main manuscript.

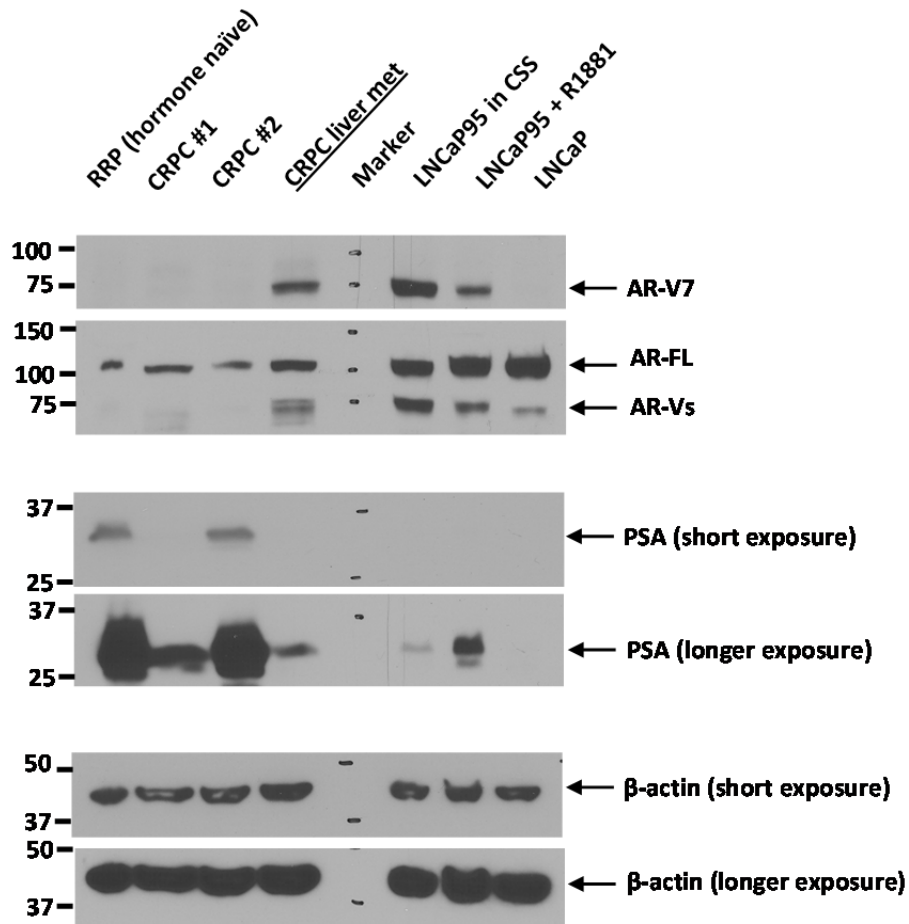

**Figure S7. Detection of AR-V7 at the protein level using Western blot analysis in patients with detectable AR-V7 transcript in CTCs.**

Detection of AR-V7 protein expression in a representative tissue sample, in this case from a liver metastasis from an AR-V7-positive patient (underlined label). Whole protein extractions were prepared from cryosections using RIPA buffer with protease inhibitors and phosphatase inhibitors. 40  $\mu$ g of protein from each sample was separated on a 10% SDS-PAGE precast gel and blotted with anti-AR-V7, anti-AR (N20) (for detection of both AR-FL and AR-Vs), anti-PSA, and anti- $\beta$ -actin antibodies. The LNCaP cell line served as the negative control for AR-V7; the LNCaP95 cell line (in the presence or absence of synthetic androgen, R1881) served as the positive control for AR-V7. Also shown for comparison are samples from a hormone-naïve radical prostatectomy specimen (RRP), and two metastatic tissue samples from AR-V7-negative patients (CRPC #1 and CRPC #2). Molecular weight marks are indicated to the left of the blots.

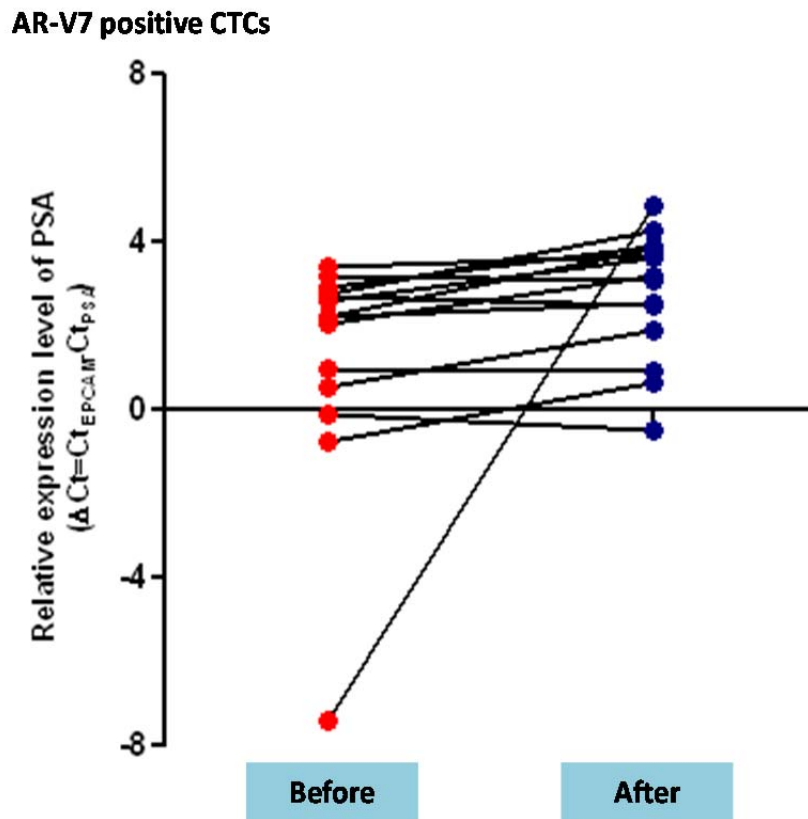

**Figure S8. Changes in expression levels of the PSA transcript before and after therapy with enzalutamide or abiraterone in men with baseline detectable AR-V7.**

PSA expression changes in CTC samples from AR-V7–positive patients before and after treatment with enzalutamide/abiraterone (n=14), as assessed by qRT-PCR. Results are shown as the difference in Ct value between EPCAM and PSA expression ( $Ct_{EPCAM} - Ct_{PSA}$ ). As depicted, PSA expression was generally increased during treatment with enzalutamide/abiraterone in AR-V7–positive patients, suggesting that canonical AR signaling (as indicated by levels of PSA mRNA normalized to those of EPCAM) was not inhibited by enzalutamide/abiraterone in the presence of AR-V7.

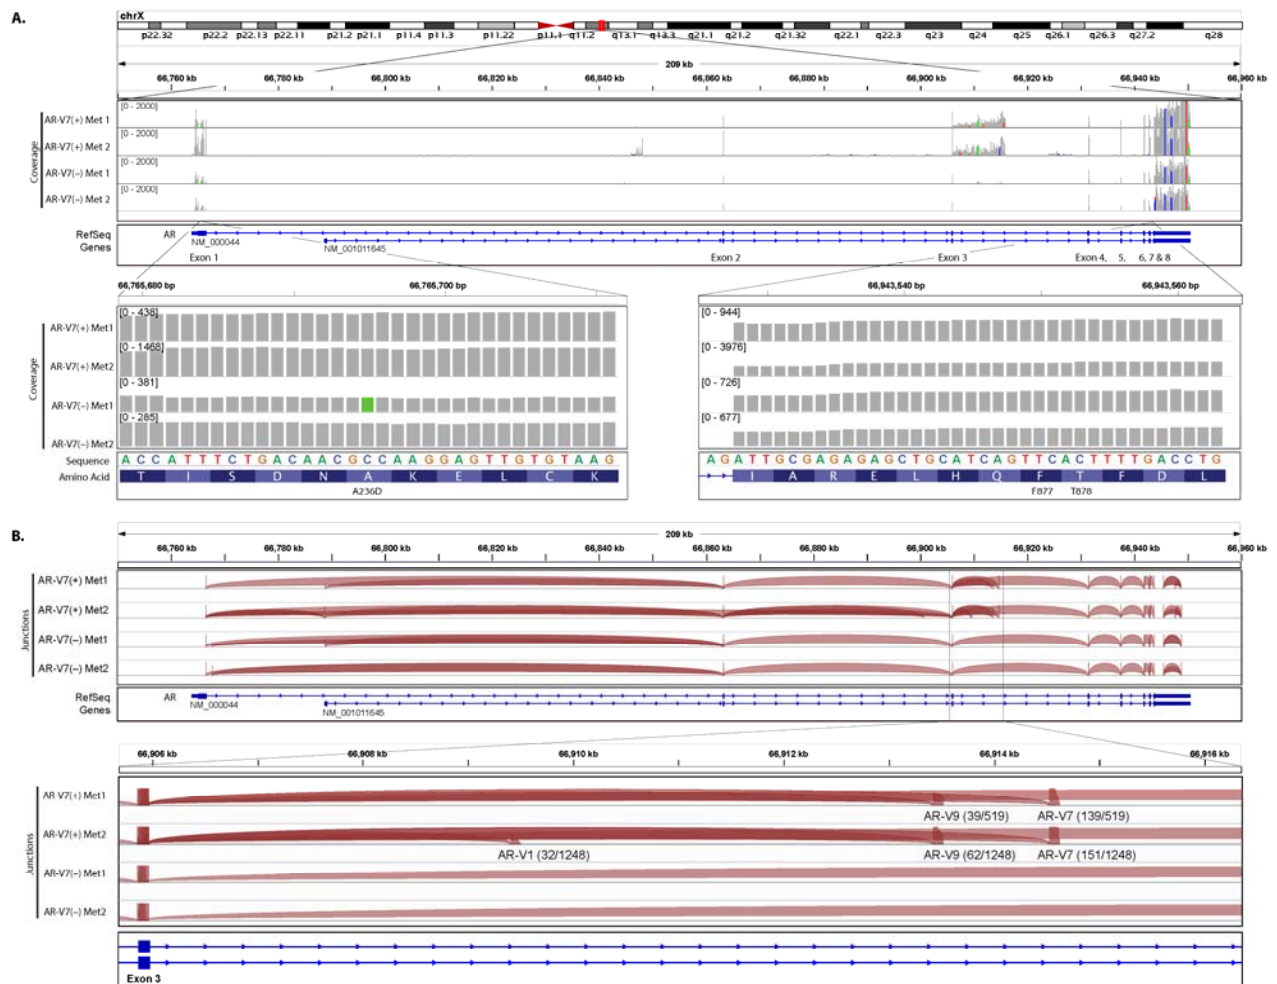

**Figure S9. RNA-Seq analysis of the AR transcript in two AR-V7 (+) and two AR-V7 (-) patients.**

(A) Read coverage along the AR gene, with the enlarged view showing a novel AR mutation (A236D) in exon 1 (of unknown significance) detected in an AR-V7-negative tumor, but a lack of known AR ligand-binding domain (LBD) mutations F876L and T877A previously implicated in castration resistance and enzalutamide resistance (note: due to Refseq sequence changes, the numbering of amino acid positions have increased by one). A236D is the only AR mutation detected in these four samples. (B) AR RNA splice junction tracks depicting sequence reads connecting canonical and cryptic AR exons (junctions supported by a read depth of at least 20 are shown in the figure). The enlarged region spanning exon 3 and intron 3 shows positively identified AR-V7 variants (along with AR-V1 and AR-V9) in the tissue samples from the two AR-V7-positive patients. Numbers in parentheses indicate the number of variant-specific reads over the number of AR-FL-specific reads. The AR-V7/AR-FL ratios were 26.8% and 12.1%, for AR-V7(+)-Met1 and AR-V7(+)-Met2, respectively.

## Positive enrichment in prostate related gene sets

| Gene Set Details                                        | # of genes | ES   | NES  | Norm p-val | FDR q-val |
|---------------------------------------------------------|------------|------|------|------------|-----------|
| 1. RESPONSE_TO_WOUNDING                                 | 87         | 0.64 | 2.27 | 0          | 0         |
| 2. DEFENSE_RESPONSE                                     | 105        | 0.61 | 2.18 | 0          | 0         |
| 3. CELLULAR_DEFENSE_RESPONSE                            | 16         | 0.86 | 2.18 | 0          | 0         |
| 4. RESPONSE_TO_EXTERNAL_STIMULUS                        | 135        | 0.57 | 2.16 | 0          | 0         |
| 5. INFLAMMATORY_RESPONSE                                | 60         | 0.63 | 2.12 | 0          | 0         |
| 6. M_PHASE_OF_MITOTIC_CELL_CYCLE                        | 67         | 0.61 | 2.08 | 0          | 0         |
| 7. G_PROTEIN_COUPLED_RECEPTOR_PROTEIN_SIGNALING_PATHWAY | 83         | 0.59 | 2.06 | 0          | 0.001     |
| 8. MITOSIS                                              | 64         | 0.6  | 2.02 | 0          | 0.002     |
| 9. M_PHASE                                              | 81         | 0.57 | 1.97 | 0          | 0.003     |
| 10. ORGAN_MORPHOGENESIS                                 | 79         | 0.56 | 1.96 | 0          | 0.003     |

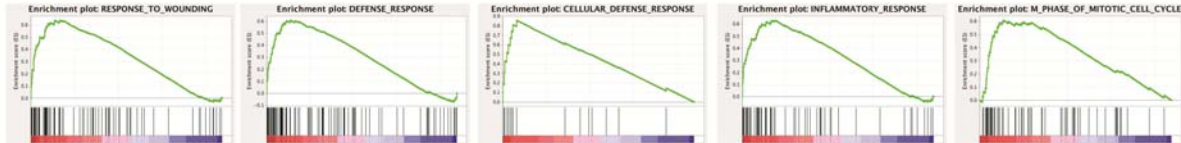

## Negative enrichment in prostate related gene sets

| Gene Set Details                                      | # of genes | ES    | NES   | Norm p-val | FDR q-val |
|-------------------------------------------------------|------------|-------|-------|------------|-----------|
| 1. GOLGI_VESICLE_TRANSPORT                            | 47         | -0.38 | -1.49 | 0.033      | 1         |
| 2. CHROMATIN_ASSEMBLY_OR_DISASSEMBLY                  | 22         | -0.43 | -1.33 | 0.115      | 1         |
| 3. GAMETE_GENERATION                                  | 44         | -0.34 | -1.27 | 0.114      | 1         |
| 4. MRNA_PROCESSING_GO_0006397                         | 70         | -0.28 | -1.17 | 0.135      | 1         |
| 5. ER_TO_GOLGI_VESICLE_MEDIATED_TRANSPORT             | 18         | -0.39 | -1.16 | 0.223      | 1         |
| 6. NEGATIVE_REGULATION_OF_TRANSCRIPTION_DNA_DEPENDENT | 94         | -0.25 | -1.12 | 0.184      | 1         |
| 7. MRNA_METABOLIC_PROCESS                             | 81         | -0.26 | -1.11 | 0.194      | 1         |
| 8. NEGATIVE_REGULATION_OF_RNA_METABOLIC_PROCESS       | 95         | -0.26 | -1.1  | 0.259      | 1         |
| 9. SEXUAL_REPRODUCTION                                | 50         | -0.28 | -1.1  | 0.288      | 1         |
| 10. PROTEIN_AUTOPROCESSING                            | 22         | -0.34 | -1.1  | 0.303      | 1         |

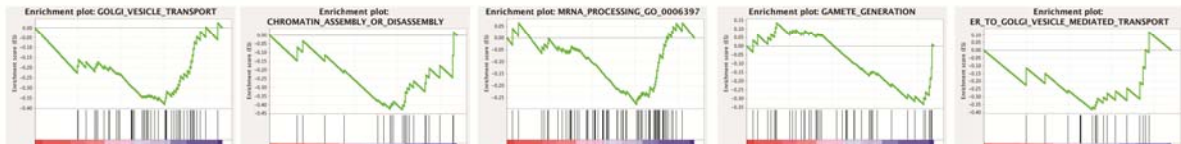

**Figure S10. Gene set enrichment analysis of metastatic tumors from AR-V7–positive and AR-V7–negative patients.**

Top ranked ‘biological processes’ enriched in genes differentially expressed between AR-V7–positive and AR-V7–negative metastatic prostate cancer tissues are shown. Genes are pre-ranked based on fold expression changes. Consistent with the ‘AR-V7 up’ and ‘AR-FL up’ gene signatures reported in our previous study,<sup>4</sup> cell cycle genes previously shown to be driven by AR-V7 (*i.e.*, ‘AR-V7 up’) are enriched for increased expression in AR-V7–positive samples, and genes involved in Golgi activities, previously linked to AR-FL activity (*i.e.*, ‘AR-FL up’), are downregulated in AR-V7-positive samples.

[ES: enrichment score. NES: normalized enrichment score].

**Table S1 A.** Baseline characteristics of the 31 patients treated with enzalutamide.

| Baseline Characteristic                                               | All Patients<br>(N=31)                | AR-V7 Negative<br>(N=19)            | AR-V7 Positive<br>(N=12)           | P-value* |
|-----------------------------------------------------------------------|---------------------------------------|-------------------------------------|------------------------------------|----------|
| <b>Age (years)</b><br>median (range)                                  | 70 (56–84)                            | 72 (60–84)                          | 69 (56–82)                         | 0.223    |
| <b>Race, N (%)</b><br>white<br>non-white                              | 26 (83.9%)<br>5 (16.1%)               | 16 (84.2%)<br>3 (15.8%)             | 10 (83.3%)<br>2 (16.7%)            | 0.999    |
| <b>Time since diagnosis (years)</b><br>median (range)                 | 5 (1–21)                              | 5 (1–21)                            | 7 (1–18)                           | 0.760    |
| <b>Tumor stage at diagnosis, N (%)</b><br>T1/T2<br>T3/T4              | 17 (54.8%)<br>14 (45.2%)              | 10 (52.6%)<br>9 (47.4%)             | 7 (58.3%)<br>5 (41.7%)             | 0.999    |
| <b>Gleason sum at diagnosis, N (%)</b><br>≤7<br>≥8                    | 12 (40.0%)<br>18 (60.0%)              | 9 (47.4%)<br>10 (52.6%)             | 3 (27.3%)<br>8 (72.7%)             | 0.442    |
| <b>Type of local treatment, N (%)</b><br>surgery<br>radiation<br>none | 13 (41.9%)<br>7 (22.6%)<br>11 (35.5%) | 8 (42.1%)<br>6 (31.6%)<br>5 (26.3%) | 5 (41.7%)<br>1 (8.3%)<br>6 (50.0%) | 0.262    |
| <b>Number of prior hormonal therapies</b><br>mean (range)             | 3.3 (2–5)                             | 3.2 (2–5)                           | 3.4 (3–5)                          | 0.317    |
| <b>Prior use of abiraterone, N (%)</b><br>yes<br>no                   | 20 (64.5%)<br>11 (35.5%)              | 9 (47.4%)<br>10 (52.6%)             | 11 (91.7%)<br>1 (8.3%)             | 0.020    |
| <b>Prior use of docetaxel, N (%)</b><br>yes<br>no                     | 20 (64.5%)<br>11 (35.5%)              | 10 (52.6%)<br>9 (47.4%)             | 10 (83.3%)<br>2 (16.7%)            | 0.128    |
| <b>Presence of bone metastases, N (%)</b><br>yes<br>no                | 28 (90.3%)<br>3 (9.7%)                | 17 (89.5%)<br>2 (10.5%)             | 11 (91.7%)<br>1 (8.3%)             | 0.999    |
| <b>Number of bone metastases, N (%)</b><br>≤5<br>≥6                   | 20 (64.5%)<br>11 (35.5%)              | 15 (78.9%)<br>4 (21.1%)             | 5 (41.7%)<br>7 (58.3%)             | 0.056    |
| <b>Presence of visceral metastases, N (%)</b><br>yes<br>no            | 10 (32.3%)<br>21 (67.7%)              | 3 (15.8%)<br>16 (84.2%)             | 7 (58.3%)<br>5 (41.7%)             | 0.021    |
| <b>ECOG performance status score, N (%)</b><br>0<br>1 or 2            | 22 (71.0%)<br>9 (29.0%)               | 16 (84.2%)<br>3 (15.8%)             | 6 (50.0%)<br>6 (50.0%)             | 0.056    |
| <b>Baseline PSA (ng/mL)</b><br>median (range)                         | 44.3<br>(4.3–3204.2)                  | 29.8<br>(4.3–452.0)                 | 144.3<br>(14.5–3204.2)             | 0.047    |
| <b>Baseline alkaline phosphatase (U/L)</b><br>median (range)          | 108 (58–872)                          | 91 (58–872)                         | 110 (82–744)                       | 0.282    |
| <b>Baseline AR-FL level (copy number)</b><br>median (range)           | 10 (0–734)                            | 4 (0–121)                           | 26 (3–734)                         | 0.003    |

\* P-value is based on Fisher's Exact test and Wilcoxon Mann-Whitney test for categorical and continuous variables, respectively.

**Table S1 B.** Baseline characteristics of the 31 patients treated with abiraterone.

| Baseline Characteristic                                               | All Patients<br>(N=31)                | AR-V7 Negative<br>(N=25)             | AR-V7 Positive<br>(N=6)             | P-value* |
|-----------------------------------------------------------------------|---------------------------------------|--------------------------------------|-------------------------------------|----------|
| <b>Age (years)</b><br>median (range)                                  | 69 (48–79)                            | 69 (48–79)                           | 69 (58–79)                          | 0.565    |
| <b>Race, N (%)</b><br>white<br>non-white                              | 25 (80.6%)<br>6 (19.4%)               | 20 (80.0%)<br>5 (20.0%)              | 5 (83.3%)<br>1 (16.7%)              | 0.999    |
| <b>Time since diagnosis (years)</b><br>median (range)                 | 5 (1–21)                              | 5 (1–13)                             | 4 (1–21)                            | 0.705    |
| <b>Tumor stage at diagnosis, N (%)</b><br>T1/T2<br>T3/T4              | 12 (38.7%)<br>19 (61.3%)              | 10 (40.0%)<br>15 (60.0%)             | 2 (33.3%)<br>4 (66.7%)              | 0.999    |
| <b>Gleason sum at diagnosis, N (%)</b><br>≤7<br>≥8                    | 8 (26.7%)<br>22 (73.3%)               | 6 (24.0%)<br>19 (76.0%)              | 2 (40.0%)<br>3 (60.0%)              | 0.589    |
| <b>Type of local treatment, N (%)</b><br>surgery<br>radiation<br>none | 14 (45.2%)<br>10 (32.3%)<br>7 (22.6%) | 10 (40.0%)<br>9 (36.0%)<br>6 (24.0%) | 4 (66.6%)<br>1 (16.7%)<br>1 (16.7%) | 0.520    |
| <b>Number of prior hormonal therapies</b><br>mean (range)             | 2.5 (2–6)                             | 2.2 (2–4)                            | 3.7 (2–6)                           | 0.020    |
| <b>Prior use of enzalutamide, N (%)</b><br>yes<br>no                  | 4 (12.9%)<br>27 (87.1%)               | 2 (8.0%)<br>23 (92.0%)               | 2 (33.3%)<br>4 (66.7%)              | 0.159    |
| <b>Prior use of docetaxel, N (%)</b><br>yes<br>no                     | 5 (16.1%)<br>26 (83.9%)               | 4 (16.0%)<br>21 (84.0%)              | 1 (16.7%)<br>5 (83.3%)              | 0.999    |
| <b>Presence of bone metastases, N (%)</b><br>yes<br>no                | 24 (77.4%)<br>7 (22.6%)               | 19 (76.0%)<br>6 (24.0%)              | 5 (83.3%)<br>1 (16.7%)              | 0.999    |
| <b>Number of bone metastases, N (%)</b><br>≤5<br>≥6                   | 17 (54.8%)<br>14 (45.2%)              | 15 (60.0%)<br>10 (40.4%)             | 2 (33.3%)<br>4 (66.7%)              | 0.370    |
| <b>Presence of visceral metastases, N (%)</b><br>yes<br>no            | 8 (25.8%)<br>23 (74.2%)               | 8 (32.0%)<br>17 (68.0%)              | 0 (0%)<br>6 (100%)                  | 0.298    |
| <b>ECOG performance status score, N (%)</b><br>0<br>1 or 2            | 25 (80.6%)<br>6 (19.4%)               | 22 (88.0%)<br>3 (12.0%)              | 3 (50.0%)<br>3 (50.0%)              | 0.069    |
| <b>Baseline PSA (ng/mL)</b><br>median (range)                         | 37.8<br>(2.2–2045.0)                  | 31.4<br>(2.2–262.2)                  | 86.9<br>(19.4–2045.0)               | 0.084    |
| <b>Baseline alkaline phosphatase (U/L)</b><br>median (range)          | 118 (59-1348)                         | 109 (59–524)                         | 263 (71–1348)                       | 0.063    |
| <b>Baseline AR-FL level (copy number)</b><br>median (range)           | 3 (0–609)                             | 1 (0–173)                            | 216 (8–609)                         | 0.002    |

\* P-value is based on Fisher's Exact test and Wilcoxon Mann-Whitney test for categorical and continuous variables, respectively.

**Table S2. Clinical outcomes (PSA responses, PSA-PFS and PFS) reported separately according to prior exposure to abiraterone (in the enzalutamide cohort) and prior exposure to enzalutamide (in the abiraterone cohort).**

**A. Enzalutamide cohort: Clinical outcomes according to prior exposure (or not) to abiraterone**

| Outcome      | No previous abiraterone<br>(n=11) |                     |                | Previous abiraterone<br>(n=20) |                    |                |
|--------------|-----------------------------------|---------------------|----------------|--------------------------------|--------------------|----------------|
|              | AR-V7 [+]<br>(n=1)                | AR-V7 [-]<br>(n=10) | <i>P</i> value | AR-V7 [+]<br>(n=11)            | AR-V7 [-]<br>(n=9) | <i>P</i> value |
| PSA Response | 0% (0/1)                          | 80% (8/10)          | 0.273          | 0% (0/11)                      | 22% (2/9)          | 0.189          |
| PFA-PFS      | HR (95%CI) not estimable          |                     | 0.005          | HR 3.34 (95%CI, 1.14–9.80)     |                    | 0.021          |
| PFS          | HR (95%CI) not estimable          |                     | 0.005          | HR 2.93 (95%CI, 0.96–8.90)     |                    | 0.048          |

**B. Abiraterone cohort: Clinical outcomes according to prior exposure (or not) to enzalutamide**

| Outcome      | No previous enzalutamide<br>(n=27) |                     |                | Previous enzalutamide<br>(n=4) |                    |                |
|--------------|------------------------------------|---------------------|----------------|--------------------------------|--------------------|----------------|
|              | AR-V7 [+]<br>(n=4)                 | AR-V7 [-]<br>(n=23) | <i>P</i> value | AR-V7 [+]<br>(n=2)             | AR-V7 [-]<br>(n=2) | <i>P</i> value |
| PSA Response | 0% (0/4)                           | 74% (17/23)         | 0.012          | 0% (0/2)                       | 0% (0/2)           | N/A            |
| PFA-PFS      | HR 41.0 (95%CI, 4.5–376.8)         |                     | <0.001         | HR (95%CI) not estimable       |                    | N/A            |
| PFS          | HR 28.2 (95%CI, 3.1–255.8)         |                     | <0.001         | HR (95%CI) not estimable       |                    | N/A            |

**C. Combined cohort: Clinical outcomes according to prior exposure to abiraterone/enzalutamide**

| Outcome      | No prior abiraterone/enzalutamide<br>(n=38) |                     |                | Prior abiraterone/enzalutamide<br>(n=24) |                     |                |
|--------------|---------------------------------------------|---------------------|----------------|------------------------------------------|---------------------|----------------|
|              | AR-V7 [+]<br>(n=5)                          | AR-V7 [-]<br>(n=33) | <i>P</i> value | AR-V7 [+]<br>(n=13)                      | AR-V7 [-]<br>(n=11) | <i>P</i> value |
| PSA Response | 0% (0/5)                                    | 76% (25/33)         | 0.003          | 0% (0/13)                                | 18% (2/11)          | 0.199          |
| PFA-PFS      | HR 55.9 (95%CI, 6.4–488.5)                  |                     | <0.001         | HR 2.91 (95%CI, 1.10–7.72)               |                     | 0.023          |
| PFS          | HR 45.2 (95%CI, 5.1–398.1)                  |                     | <0.001         | HR 2.65 (95%CI, 0.97–7.25)               |                     | 0.048          |



**Table S3. Propensity score weighted multivariable Cox models adjusted for Gleason score, baseline PSA, number of prior hormonal treatments, presence of visceral metastases, ECOG score, prior abiraterone/enzalutamide use, and AR-FL levels.**

**A. Propensity score weighted multivariable Cox model for PSA-PFS in enzalutamide-treated men**

| Variable                 | Hazard Ratio (HR) | 95% Confidence Interval (95% CI) | <i>P</i> value |
|--------------------------|-------------------|----------------------------------|----------------|
| AR-V7 Positive           | 3.40              | (1.43 – 8.08)                    | 0.006          |
| AR-FL Level (log)        | 1.33              | (1.03 – 1.72)                    |                |
| Prior use of Abiraterone | 2.66              | (0.72 – 9.86)                    |                |

**B. Propensity score weighted multivariable Cox model for PFS in enzalutamide-treated men**

| Variable                 | Hazard Ratio (HR) | 95% Confidence Interval (95% CI) | <i>P</i> value |
|--------------------------|-------------------|----------------------------------|----------------|
| AR-V7 Positive           | 3.38              | (1.35 – 8.46)                    | 0.009          |
| AR-FL Level (log)        | 1.64              | (1.14 – 2.35)                    |                |
| Prior use of Abiraterone | 1.54              | (0.31 – 7.79)                    |                |

**C. Propensity score weighted multivariable Cox model for PSA-PFS in abiraterone-treated men**

| Variable                  | Hazard Ratio (HR) | 95% Confidence Interval (95% CI) | <i>P</i> value |
|---------------------------|-------------------|----------------------------------|----------------|
| AR-V7 Positive            | 17.51             | (3.53 – 87.03)                   | <0.001         |
| AR-FL Level (log)         | 1.05              | (0.87 – 1.25)                    |                |
| Prior use of Enzalutamide | 0.61              | (0.17 – 2.19)                    |                |

**D. Propensity score weighted multivariable Cox model for PFS in abiraterone-treated men**

| Variable                  | Hazard Ratio (HR) | 95% Confidence Interval (95% CI) | <i>P</i> value |
|---------------------------|-------------------|----------------------------------|----------------|
| AR-V7 Positive            | 5.25              | (1.09 – 25.21)                   | 0.038          |
| AR-FL Level (log)         | 1.36              | (0.97 – 1.90)                    |                |
| Prior use of Enzalutamide | 1.72              | (0.50 – 5.92)                    |                |

**Table S4. Clinical outcomes (PSA responses, PSA-PFS and PFS) for the entire patient population according to their AR-V7 ‘conversion’ rates.**

Footnote: Of the 44 patients who were AR-V7–negative at baseline, 42 had at least one follow-up sample collected; 36 of these men (86%) remained AR-V7–negative at follow-up (AR-V7[–] → AR-V7[–]), while 6 of these men (14%) converted to AR-V7–positive at follow-up (AR-V7[–] → AR-V7[+]). Of the 18 patients who were AR-V7–positive at baseline, 16 had at least one follow-up sample collected; all of these men remained AR-V7–positive at follow-up (AR-V7[+] → AR-V7[+]). The clinical outcomes of these patients are also shown.

These data should be interpreted with caution (and are hypothesis-generating only) because we have not taken into account the timing of the subsequent sample collection, and we have not performed time-dependent covariate analysis or landmark analysis to adjust for this. Therefore, the clinical outcomes in each group cannot be formally compared with each other, and are provided for descriptive purposes only.

| <b>Outcome</b> | <b>AR-V7[–] → AR-V7[–]</b><br>(n=36) | <b>AR-V7[–] → AR-V7[+]</b><br>(n=6) | <b>AR-V7[+] → AR-V7[+]</b><br>(n=16) |
|----------------|--------------------------------------|-------------------------------------|--------------------------------------|
| PSA Response   | 68%<br>(95%CI, 52 – 81%)             | 17%<br>(95%CI, 4 – 58%)             | 0%<br>(95%CI, 0 – 19%)               |
| PFA-PFS        | 6.1 months<br>(95%CI, 5.9 mo – NA)   | 3.0 months<br>(95%CI, 2.3 mo – NA)  | 1.4 months<br>(95%CI, 0.9 – 2.6 mo)  |
| PFS            | 6.5 months<br>(95%CI, 6.1 mo – NA)   | 3.2 months<br>(95%CI, 3.1 mo – NA)  | 2.1 months<br>(95%CI, 1.9 – 3.1 mo)  |

**Table S5. Expression profiles of AR-regulated genes in AR-V7–positive and AR-V7–negative metastatic tumors.**

Footnote: A total of 34 canonical AR regulated genes were identified by combined analysis of downloaded expression data reported in two published studies.<sup>1,11</sup> The AR gene did not make the selection but was added for reference. For each of the 35 genes, the number of raw RNA-Seq reads and sequencing reads normalized by “Reads Per Kilo Gene Size Per Million of Total Reads” (RPKM= number of raw counts/(gene-length/1000)/(total-reads/1,000,000) in each of the four tumor samples, as well as the log fold expression change between AR-V7-positive and AR-V7-negative tumors calculated from RPKM-normalized data, are displayed. Annexed to the RNA-Seq data are previously published expression microarray data<sup>4</sup> characterizing AR-V7– versus AR-FL–driven transcriptional programs (expression ratios normalized to a common reference sample were downloaded from GEO accession number GSE36549). Fold expression changes in AR-V7–positive samples when compared to AR-V7–negative tumors (log FC) are significantly correlated ( $P<0.001$ , with a correlation coefficient of 0.68) with fold expression changes induced by AR-V7 in the absence of AR-FL activation (log FC by ARV7), but not significantly correlated ( $p>0.05$ , with a correlation coefficient of 0.23) with fold expression changes induced by AR-FL activation (log FC by ARFL).

| Gene            | Size (bp) | Raw V7(-) Met 1 | Raw V7(-) Met 2 | Raw V7(+) Met 1 | Raw V7(+) Met 2 | RPKM V7(-) Met 1 | RPKM V7(-) Met 2 | RPKM V7(+) Met 1 | RPKM V7(+) Met 2 | log FC | CSS   | R1881 | CSS + ARV7 | R1881 + ARV7 | log FC by ARV7 | log FC by ARFL |
|-----------------|-----------|-----------------|-----------------|-----------------|-----------------|------------------|------------------|------------------|------------------|--------|-------|-------|------------|--------------|----------------|----------------|
| <i>AR</i>       | 4496      | 23044           | 20645           | 21722           | 62370           | 111.83           | 92.43            | 54.53            | 201.92           | -0.22  | 0.10  | -0.89 | -0.01      | -0.96        | -0.11          | -0.99          |
| <i>C1orf116</i> | 5502      | 3123            | 5063            | 3293            | 10168           | 12.38            | 18.52            | 6.75             | 26.90            | -0.62  | -0.90 | 1.05  | -0.90      | 0.99         | 0.01           | 1.95           |
| <i>CENPN</i>    | 5307      | 1337            | 11671           | 1799            | 907             | 5.50             | 44.27            | 3.83             | 2.49             | -3.26  | -2.67 | 0.52  | -1.92      | 0.88         | 0.75           | 3.20           |
| <i>CXCR4</i>    | 2005      | 654             | 695             | 10593           | 7739            | 7.12             | 6.98             | 59.63            | 56.18            | 2.65   | -0.40 | 2.77  | -0.26      | 3.51         | 0.13           | 3.17           |
| <i>DBI</i>      | 1260      | 11624           | 10108           | 43384           | 10800           | 201.28           | 161.47           | 388.60           | 124.76           | 0.11   | -0.50 | 3.07  | 0.33       | 3.19         | 0.82           | 3.57           |
| <i>EAF2</i>     | 1020      | 66              | 212             | 3689            | 116             | 1.41             | 4.18             | 40.82            | 1.66             | 0.74   | 0.10  | 4.18  | 0.37       | 3.77         | 0.28           | 4.08           |
| <i>EBP</i>      | 1157      | 784             | 3333            | 3322            | 2755            | 14.78            | 57.98            | 32.40            | 34.66            | -0.20  | -0.48 | 0.88  | -0.07      | 0.75         | 0.41           | 1.35           |
| <i>FASN</i>     | 8458      | 2272            | 5891            | 19983           | 46976           | 5.86             | 14.02            | 26.66            | 80.84            | 1.97   | -0.50 | 0.61  | -0.06      | 0.86         | 0.44           | 1.11           |
| <i>FKBP5</i>    | 10628     | 3810            | 34978           | 55568           | 66987           | 7.82             | 66.24            | 59.01            | 91.74            | 1.32   | -1.28 | 3.61  | 1.26       | 4.03         | 2.54           | 4.89           |
| <i>FZD5</i>     | 6564      | 3247            | 6014            | 3756            | 2384            | 10.79            | 18.44            | 6.46             | 5.29             | -1.98  | -1.12 | 1.65  | -0.93      | 1.80         | 0.19           | 2.77           |

|                |       |        |        |        |        |         |         |         |        |       |       |       |       |       |       |      |
|----------------|-------|--------|--------|--------|--------|---------|---------|---------|--------|-------|-------|-------|-------|-------|-------|------|
| <b>HMGCR</b>   | 4582  | 2395   | 3169   | 3526   | 2334   | 11.40   | 13.92   | 8.68    | 7.41   | -1.25 | 0.06  | 1.54  | 0.07  | 1.27  | 0.01  | 1.49 |
| <b>HMGCS1</b>  | 3510  | 2596   | 5207   | 12367  | 3282   | 16.14   | 29.86   | 39.76   | 13.61  | -0.38 | 0.40  | 2.15  | 0.65  | 1.79  | 0.25  | 1.75 |
| <b>HPGD</b>    | 3022  | 127    | 57     | 392    | 29067  | 0.92    | 0.38    | 1.46    | 140.00 | 3.64  | -2.52 | 3.46  | -0.05 | 4.05  | 2.47  | 5.98 |
| <b>INSIG1</b>  | 3081  | 421    | 3684   | 3118   | 8029   | 2.98    | 24.07   | 11.42   | 37.93  | 0.90  | -0.58 | 1.55  | 0.27  | 2.00  | 0.85  | 2.13 |
| <b>KLK2</b>    | 2872  | 286904 | 327838 | 82985  | 16542  | 2179.51 | 2297.62 | 326.10  | 83.84  | -3.76 | -4.34 | 0.14  | -3.86 | 0.37  | 0.48  | 4.48 |
| <b>KLK3</b>    | 2214  | 213712 | 922556 | 121923 | 32693  | 2106.00 | 8387.23 | 621.51  | 214.93 | -3.03 | -3.75 | -0.16 | -2.95 | 0.37  | 0.80  | 3.59 |
| <b>KLK4</b>    | 1347  | 2478   | 3956   | 813    | 4579   | 40.14   | 59.11   | 6.81    | 49.48  | -1.81 | -2.68 | -0.19 | -2.59 | -0.20 | 0.08  | 2.49 |
| <b>LDLR</b>    | 5283  | 149    | 1947   | 2714   | 5261   | 0.62    | 7.42    | 5.80    | 14.49  | 1.47  | -0.82 | 1.70  | -0.23 | 1.50  | 0.60  | 2.52 |
| <b>MAF</b>     | 6878  | 425    | 778    | 4311   | 1659   | 1.35    | 2.28    | 7.07    | 3.51   | 0.59  | -1.22 | 2.98  | -1.54 | 2.81  | -0.32 | 4.20 |
| <b>MICAL1</b>  | 3644  | 685    | 88     | 2959   | 2630   | 4.10    | 0.49    | 9.16    | 10.51  | 2.00  | 0.32  | 3.28  | 0.28  | 3.14  | -0.04 | 2.96 |
| <b>NCAPD3</b>  | 5605  | 849    | 1024   | 2601   | 4880   | 3.30    | 3.68    | 5.24    | 12.67  | 0.63  | -0.62 | 2.50  | -0.22 | 2.55  | 0.41  | 3.12 |
| <b>NDRG1</b>   | 3478  | 66845  | 19467  | 44162  | 124199 | 419.32  | 112.66  | 143.30  | 519.78 | 0.22  | -1.02 | 2.99  | 0.11  | 3.35  | 1.14  | 4.01 |
| <b>NKX3-1</b>  | 3281  | 35635  | 53042  | 44160  | 43298  | 236.96  | 325.40  | 151.90  | 192.08 | -0.89 | -2.62 | 1.17  | -2.59 | 1.04  | 0.04  | 3.80 |
| <b>ORM1</b>    | 839   | 3      | 2407   | 94992  | 21539  | 0.08    | 57.75   | 1277.81 | 373.67 | 7.90  | -0.88 | 4.10  | 6.70  | 6.47  | 7.57  | 4.97 |
| <b>PMEPA1</b>  | 5186  | 10061  | 16129  | 7660   | 5565   | 42.33   | 62.60   | 16.67   | 15.62  | -2.12 | -1.49 | 1.04  | -0.81 | 1.22  | 0.67  | 2.52 |
| <b>PTPN21</b>  | 6215  | 551    | 1684   | 565    | 2532   | 1.93    | 5.45    | 1.03    | 5.93   | -1.28 | 1.08  | 3.51  | 0.84  | 3.47  | -0.24 | 2.43 |
| <b>RAB3B</b>   | 12844 | 2274   | 10492  | 8012   | 3620   | 3.86    | 16.44   | 7.04    | 4.10   | -1.33 | -1.39 | 1.25  | -1.14 | 1.22  | 0.25  | 2.64 |
| <b>RHOA</b>    | 4758  | 16379  | 28644  | 5876   | 7735   | 75.11   | 121.17  | 13.94   | 23.66  | -2.77 | 0.28  | 3.58  | 0.34  | 3.71  | 0.06  | 3.30 |
| <b>SCAP</b>    | 4255  | 609    | 869    | 1134   | 4593   | 3.12    | 4.11    | 3.01    | 15.71  | 0.34  | -0.29 | 0.76  | -0.11 | 0.99  | 0.18  | 1.05 |
| <b>SGK1</b>    | 3965  | 105    | 24777  | 20302  | 1347   | 0.58    | 125.78  | 57.79   | 4.94   | 0.24  | -0.10 | 3.35  | -0.05 | 3.62  | 0.05  | 3.45 |
| <b>SLC45A3</b> | 3382  | 5108   | 7039   | 2578   | 15489  | 32.95   | 41.89   | 8.60    | 66.66  | -1.03 | -2.52 | 1.07  | -2.29 | 1.42  | 0.23  | 3.59 |
| <b>TMPRSS2</b> | 3320  | 4457   | 54020  | 27831  | 19920  | 29.29   | 327.51  | 94.61   | 87.33  | -0.53 | -4.59 | -0.38 | -3.92 | 0.09  | 0.67  | 4.21 |
| <b>WIPI1</b>   | 1924  | 209    | 435    | 6828   | 1472   | 2.37    | 4.55    | 40.05   | 11.14  | 2.15  | -0.10 | 2.57  | 0.98  | 2.86  | 1.08  | 2.67 |
| <b>WWC1</b>    | 6739  | 2465   | 1922   | 6536   | 5735   | 7.98    | 5.74    | 10.95   | 12.39  | 0.26  | -0.75 | 0.16  | -0.99 | 0.21  | -0.23 | 0.91 |
| <b>ZNF350</b>  | 2341  | 2985   | 3161   | 5862   | 1155   | 27.82   | 27.18   | 28.26   | 7.18   | -1.54 | 0.27  | 1.27  | 0.18  | 1.35  | -0.09 | 1.00 |

**Table S6.  $R^2$  values for regression models that include only AR-FL levels (continuous variable) compared to regression models that additionally include AR-V7 status, for each clinical outcome (PSA response rate, PSA-PFS and PFS).**

Footnote: The  $R^2$  values are based on the Sums-of-squares method of Mittleböck and Schemper (Computing measures of explained variation for logistic regression models. Computer Methods and Programs in Biomedicine 1999; 58:17-24) for PSA response rate, and on the method of Heller (A measure of explained risk in the proportional hazards model. Biostatistics 2012; 13:315-325) for PSA-PFS and PFS. P-values are based on the Likelihood ratio test.

| Outcome      | Regression Models –<br>Enzalutamide Cohort |               |                | Regression Models –<br>Abiraterone Cohort |               |                |
|--------------|--------------------------------------------|---------------|----------------|-------------------------------------------|---------------|----------------|
|              | AR-FL alone                                | AR-FL + AR-V7 | <i>P</i> value | AR-FL alone                               | AR-FL + AR-V7 | <i>P</i> value |
| PSA Response | $R^2 = 0.307$                              | $R^2 = 0.449$ | 0.019          | $R^2 = 0.203$                             | $R^2 = 0.336$ | 0.021          |
| PFA-PFS      | $R^2 = 0.196$                              | $R^2 = 0.573$ | <0.001         | $R^2 = 0.651$                             | $R^2 = 0.793$ | 0.012          |
| PFS          | $R^2 = 0.341$                              | $R^2 = 0.649$ | <0.001         | $R^2 = 0.869$                             | $R^2 = 0.903$ | 0.083          |

## Supplementary References

1. Hu R, Dunn TA, Wei S, et al. Ligand-independent androgen receptor variants derived from splicing of cryptic exons signify hormone-refractory prostate cancer. *Cancer Res* 2009;69:16-22.
2. Watson PA, Chen YF, Balbas MD, et al. Constitutively active androgen receptor splice variants expressed in castration-resistant prostate cancer require full-length androgen receptor. *Proceedings of the National Academy of Sciences* 2010.
3. Hu R, Isaacs WB, Luo J. A snapshot of the expression signature of androgen receptor splicing variants and their distinctive transcriptional activities. *The Prostate* 2011;71:1656-67.
4. Hu R, Lu C, Mostaghel EA, et al. Distinct transcriptional programs mediated by the ligand-dependent full-length androgen receptor and its splice variants in castration-resistant prostate cancer. *Cancer Res* 2012;72:3457-62.
5. Luo J, Duggan DJ, Chen Y, et al. Human prostate cancer and benign prostatic hyperplasia: molecular dissection by gene expression profiling. *Cancer Res* 2001;61:4683-8.
6. Aryee MJ, Liu W, Engelmann JC, et al. DNA methylation alterations exhibit intraindividual stability and interindividual heterogeneity in prostate cancer metastases. *Science translational medicine* 2013;5:169ra10.
7. Liu W, Laitinen S, Khan S, et al. Copy number analysis indicates monoclonal origin of lethal metastatic prostate cancer. *Nature medicine* 2009;15:559-65.
8. Robinson JT, Thorvaldsdottir H, Winckler W, et al. Integrative genomics viewer. *Nature biotechnology* 2011;29:24-6.
9. Anders S, Pyl PT, Huber W. HTSeq—A Python framework to work with high-throughput sequencing data. *bioRxiv* 2014.
10. Subramanian A, Tamayo P, Mootha VK, et al. Gene set enrichment analysis: a knowledge-based approach for interpreting genome-wide expression profiles. *Proceedings of the National Academy of Sciences of the United States of America* 2005;102:15545-50.
11. Norris JD, Chang CY, Wittmann BM, et al. The homeodomain protein HOXB13 regulates the cellular response to androgens. *Molecular cell* 2009;36:405-16.
